# Supplementary material for: Polysaccharide extract of Spirulina sp. increases effector immune-cell killing activities against cholangiocarcinoma
Source: PubMed Central journal article supplement (PMC11500882; doi:10.1371/journal.pone.0312414), 2024-10-24
Supplement: pone.0312414.s001.pdf [file pone.0312414.s001.pdf]

**Supplementary Table S1** Monosaccharide composition of hydrolyzed polysaccharide extract from *Spirulina* sp.

| <b>Sugar</b> | <b>Amount (mg/mL)</b> | <b>% Composition</b> |
|--------------|-----------------------|----------------------|
| Glucose      | 0.63±0.06             | 61.76                |
| Galactose    | 0.05±0.00             | 4.90                 |
| Rhamnose     | 0.21±0.01             | 20.59                |
| Arabinose    | 0.13±0.00             | 12.75                |
| Xylose       | Not detected          | Not detected         |
| Mannose      | Not detected          | Not detected         |
| <b>Total</b> | 1.02                  | 100                  |
