# Supplementary material for: Polysaccharide extract of Spirulina sp. increases effector immune-cell killing activities against cholangiocarcinoma
Source: PubMed Central journal article supplement (PMC11500882; doi:10.1371/journal.pone.0312414), 2024-10-24
Supplement: pone.0312414.s002.pdf [file pone.0312414.s002.pdf]

**Supplementary Table S2** A list of reports on the anti-cancer activity of *Spirulina* sp. polysaccharides.

| <b>Extract</b>           | <b>Strain</b>              | <b>Cell line</b>               | <b>Reference</b>        |
|--------------------------|----------------------------|--------------------------------|-------------------------|
| Polysaccharides          | <i>Spirulina platensis</i> | Gastric cancer cell            | Uppin et al., 2023      |
| Sulfated polysaccharides | <i>Spirulina platensis</i> | MCF7 breast cancer cell        | Mendhulkar et al., 2020 |
| Polysaccharides          | <i>Spirulina platensis</i> | Human hepatocellular carcinoma | Al-Badwy et al., 2023   |
| Polysaccharides          | <i>Spirulina</i> sp.       | A375 human melanoma cells      | Yang et al., 2012       |
